# Supplementary material
Source: publisher site journal article supplement (https://www.dovepress.com/article/492691)
Supplement: Supplementary file 1 [file get_supplementary_file.php]

**
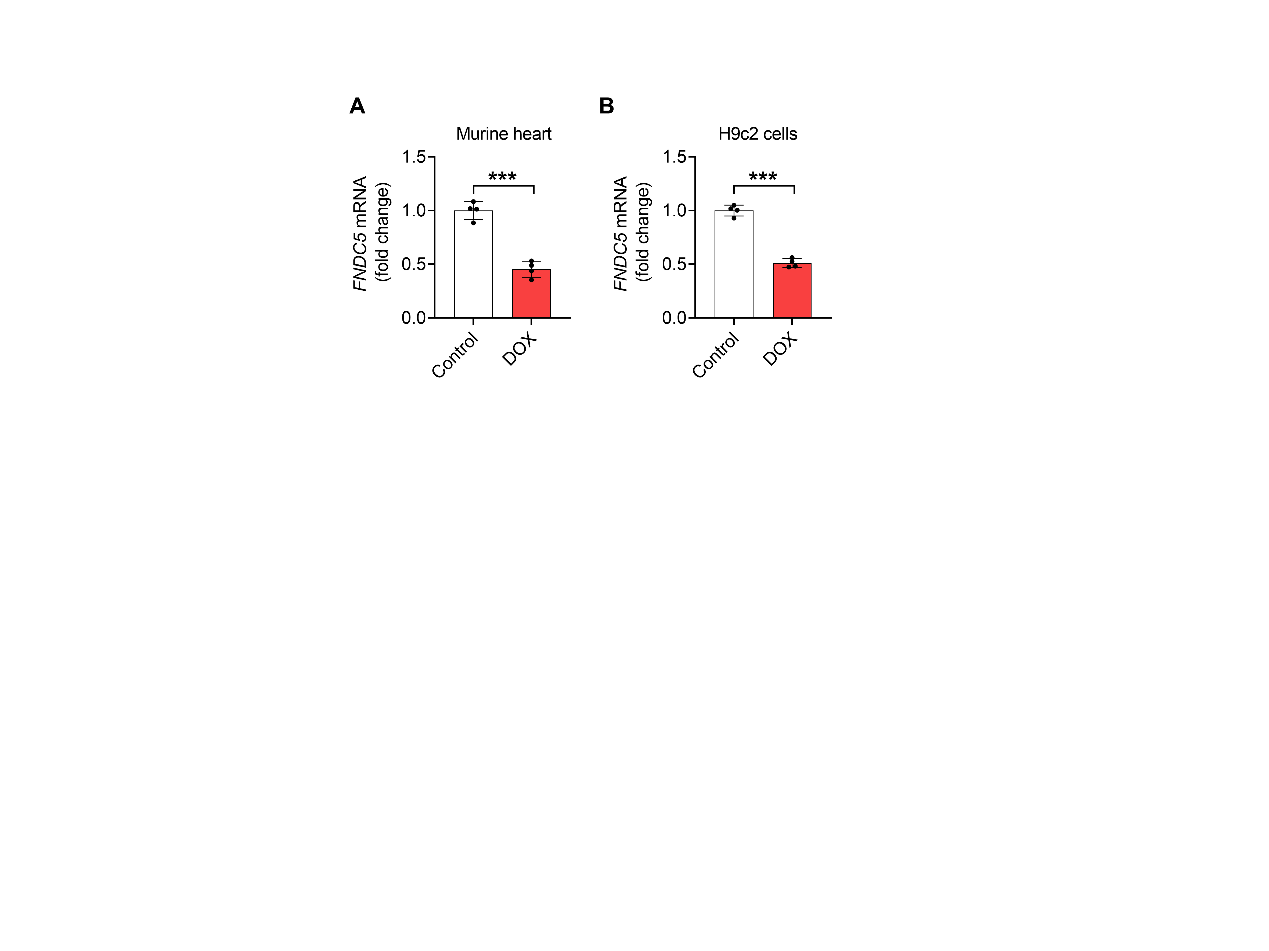
**

**Fig. S1** FNDC5 expression was decreased in DOX-treated mice hearts and cardiomyocytes (n = 4 per group)

(A and B). FNDC5 mRNA expression in hearts (A) and H9c2 cells (B) after DOX treatment.

Data are expressed as mean ± standard deviation (SD). ***P < 0.001 was considered statistically significant.


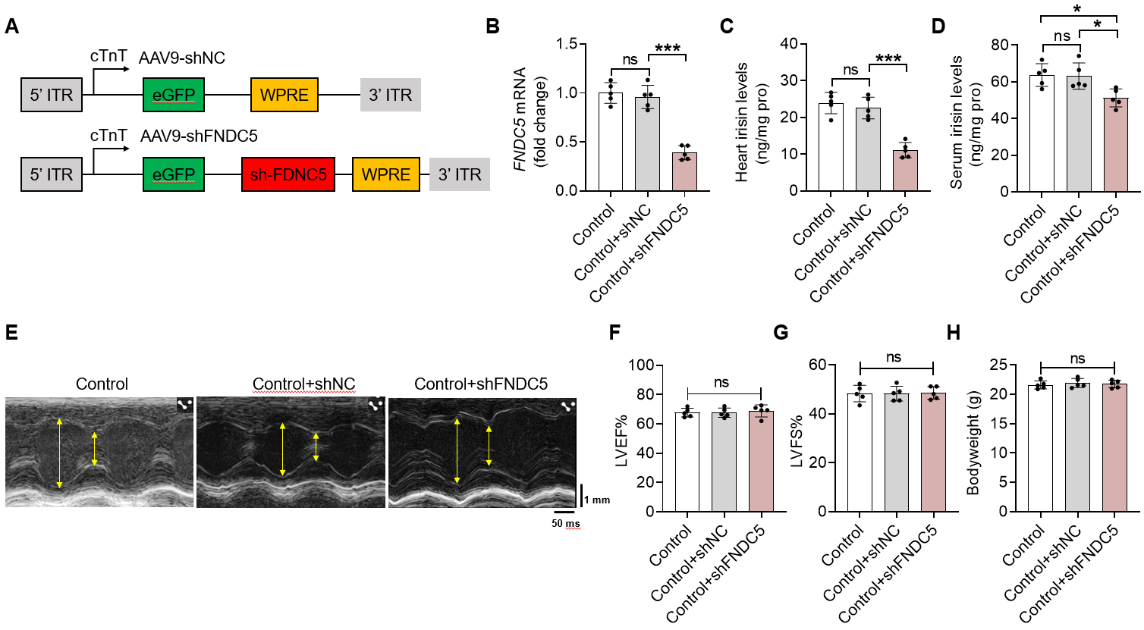


**Fig. S2** FNDC knockdown showed no influence on heart function and body weight under normal condition. Mice receiving AAV9-cTnT-shFNDC5 or AAV9-cTnT-shNC injection. Hearts were harvested 4 weeks after virus injection for analysis (n = 6 per group).

(A). Schematic diagram of AAV9-cTnT-shFNDC5 construct.

(B). FNDC5 mRNA expression of heart tissues.

(C-D). Irisin level in heart (C) and serum (D).

(E). Representative echocardiography images of heart in M-mode.

(F-G). Quantification of LVEF% (E) and LVFS% (F).

(H). Quantification of body weight.

Data are expressed as mean ± SD. *P < 0.05, and ***P < 0.001 was considered statistically significant and ns indicates not significant.
